# Supplementary material for: Subacute thyroiditis after receiving the vaccine for COVID-19: a case report and literature review
Source: PubMed Central journal article supplement — Clin Exp Vaccine Res. 2022 May 31;11(2):226–9. doi: 10.7774/cevr.2022.11.2.226 (PMC9200653; doi:10.7774/cevr.2022.11.2.226), 2022-05-31
Supplement: cevr-11-226-s001.pdf [file cevr-11-226-s001.pdf]

**Supplement 1.** Previously reported cases of subacute thyroiditis after the coronavirus disease 2019 vaccination

| Ref | Country | Gender, age (yr) | Vaccine     | Dose, time between vaccine and onset of thyroiditis | Medical history with thyroid diseases | Clinical presentation                                                             | FT3      | FT4      | TSH          | Ultrasound                                                                              | Thyroid antibodies | Treatment                                     |
|-----|---------|------------------|-------------|-----------------------------------------------------|---------------------------------------|-----------------------------------------------------------------------------------|----------|----------|--------------|-----------------------------------------------------------------------------------------|--------------------|-----------------------------------------------|
| 1   | Greece  | F, 51            | Pfizer      | First dose, 4 days                                  | No                                    |                                                                                   | Normal   | Elevated | Depressed    | -                                                                                       | Negative           | Methylprednisolone                            |
| 1   | Greece  | F, 39            | AstraZeneca | NR, 3 weeks                                         | No                                    |                                                                                   | Normal   | Elevated | Suppressed   | -                                                                                       | Positive           | None                                          |
| 2   | Greece  | F, 35            | Pfizer      | First dose, 12 days                                 |                                       | Neck pain radiating to the jaw and ear, fatigue, and rare palpitations            | -        | Elevated | Depressed    | Increased gland dimensions with heterogeneous appearance and with hypoechogenic regions | Negative           | Prednisolone                                  |
| 2   | Greece  | F, 32            | Pfizer      | Second dose, 4 days                                 |                                       | Neck pain radiating to the jaw and ear, and mild fatigue                          | -        | Normal   | Undetectable | Increased gland dimensions with heterogeneous appearance and with hypoechogenic regions | Negative           | Prednisolone                                  |
| 3   | Germany | F, 26            | AstraZeneca | First dose, 2 days                                  | No                                    | Cervical pain, fever, chills                                                      | Elevated | Normal   | Normal       | Distinct ill-defined hypoechoic area with decreased blood flow                          |                    | Ibuprofen, then Prednisolone                  |
| 3   | Germany | F, 49            | Moderna     | First dose, 1 month                                 | No                                    | Headaches, difficulty in concentrating, sore throat                               | Normal   | Normal   | Normal       | Distinct ill-defined hypoechoic area with decreased blood flow                          |                    | Ibuprofen, then Diclofenac, then Prednisolone |
| 4   | India   | F, 47            | AstraZeneca | First dose, NR                                      |                                       | Fever, neck pain, restlessness, difficulty in swallowing, and weight loss of 3 kg | Elevated | Elevated | Depressed    | Enlarged gland, heterogeneous echotexture, hypoechoic nodules                           |                    | Propranolol in 8 weeks                        |
| 5   | USA     | F, 42            | Pfizer      | First dose, 5 days                                  | No                                    | Sore throat and palpitations                                                      | Elevated | Elevated | Depressed    |                                                                                         | Negative           | Prednisolone and propanolol                   |
| 6   | Turkey  | F, 35            | CoronaVac   | Second dose, 4 days                                 | No                                    | Neck pain and palpitation                                                         | Normal   | Normal   | Normal       | Hypoechoic areas with decreased blood flow on Doppler USG                               | Negative           | Methylprednisolone and propanolol in 4 weeks  |
| 6   | Turkey  | F, 34            | CoronaVac   | First dose, 4 days                                  | No                                    | Neck pain, fatigue, palpitations, and weight loss                                 | Elevated | Normal   | Depressed    | Hypoechoic areas with decreased blood flow on Doppler USG                               | Negative           | Methylprednisolone and propanolol in 10 weeks |
| 6   | Turkey  | F, 37            | CoronaVac   | Second dose, 7 days                                 | No                                    | Neck pain                                                                         | Elevated | Normal   | Normal       | Hypoechoic areas with irregular borders and reduced blood flow                          | Negative           | None                                          |
| 7   | UK      | F, 55            | AstraZeneca | First dose, 3 weeks                                 | No                                    | Neck pain, swelling, headache, sore throat, palpitations, generalized aches       | Elevated | Elevated | Depressed    | Enlarged thyroid gland with heterogeneous echotexture throughout                        | Negative           | Levothyroxine, Propranolol, NSAIDs            |

(Continued on next page)

Supplement 1. Continued

| Ref | Country | Gender, age (yr) | Vaccine     | Dose, time between vaccine and onset of thyroiditis | Medical history with thyroid diseases | Clinical presentation                                                                                                           | FT3      | FT4      | TSH          | Ultrasound                                                                                             | Thyroid antibodies | Treatment                                 |
|-----|---------|------------------|-------------|-----------------------------------------------------|---------------------------------------|---------------------------------------------------------------------------------------------------------------------------------|----------|----------|--------------|--------------------------------------------------------------------------------------------------------|--------------------|-------------------------------------------|
| 8   | USA     | M, 48            | -           | Second dose, 7 days                                 | -                                     | Neck swelling, throat discomfort, palpitations, fevers, and weight loss                                                         | Elevated | Elevated | Depressed    | Hypoechoic and heterogeneous echotexture                                                               | -                  | Prednisolon and NSAIDs in 1 week          |
| 9   | USA     | F, 46            | Moderna     | First dose, several days                            | No                                    | Neck pain, fever, and myalgia, tachycardia                                                                                      | Elevated | Elevated | Undetectable | Hypoechoic nodules in the inferior and superior poles                                                  | -                  | Dexamethasone and Propranolol             |
| 10  | UK      | M, 75            | AstraZeneca | First dose, 14 days                                 | No                                    | Headache, neck pain, mild pyrexia, and tachycardia                                                                              | Elevated | Elevated | Undetectable | -                                                                                                      | Negative           | NSAID                                     |
| 11  | Turkey  | M, 67            | Vero Cell   | Second dose, 2 weeks                                | No                                    | Fever, neck pain, tachycardia, and weight loss of 3 kg                                                                          | Elevated | Elevated | Depressed    | Reduced echogenicity and diffusely heterogeneous texture with pseudonodular areas                      | -                  | NSAID                                     |
| 12  | Turkey  | F, 38            | CoronaVac   | Second dose, 2 weeks                                | No                                    | Neck pain, fatigue, loss of appetite, and sweating                                                                              | Elevated | Elevated | Depressed    | Increased size of the right thyroid lobe, an irregularly demarcated hypoechoic area                    | -                  | NSAID and propranolol, then levothyroxine |
| 13  |         | F, 34            | Covaxin     | First dose, 7 days                                  | No                                    | Mild fever, palpitation, and radiating anterior neck pain                                                                       | Elevated | Elevated | Undetectable | Heterogeneity and decreased vascularity of the thyroid gland                                           | -                  | Prednisolon and NSAIDs in 1 week          |
| 14  | UK      | F, 40            | Pfizer      | Second dose, 12 hours                               | No                                    | Malaise, palpitation, and severe anterior neck pain                                                                             | -        | Elevated | Depressed    | Heterogeneous thyroid parenchyma, modest enlargement of the gland and diffusely hypoechoic appearances | Negative           | Prednisolon                               |
| 15  | Norway  | F, NR            | Pfizer      | First dose, 6 days                                  |                                       | Thyroid carcinoma in course of treatment (lobectomy of left thyroid lobe, radioactive iodine therapy and levothyroxine therapy) |          | Normal   | Depressed    | -                                                                                                      | -                  | -                                         |
| 16  | USA     | F, 57            | Pfizer      | Second dose, 1 days                                 | No                                    | Neck pain and swelling                                                                                                          | -        | Elevated | Depressed    | -                                                                                                      | Negative           | -                                         |

Ref, reference; FT3, free triiodothyronine; FT4, free thyroxine; TSH, thyroid-stimulating hormone; F, female; M, male; NR, not reported; USG, ultrasound; NSAIDs, non-steroidal anti-inflammatory drugs.

## References

1. Siolos A, Gartzonika K, Tigas S. Thyroiditis following vaccination against COVID-19: report of two cases and review of the literature. *Metabol Open* 2021;12:100136.
2. Chatzi S, Karampela A, Spiliopoulou C, Boutzios G. Subacute thyroiditis after SARS-CoV-2 vaccination: a report of two sisters and summary of the literature. *Hormones (Athens)* 2022;21:177-9.
3. Bornemann C, Woyk K, Bouter C. Case report: two cases of subacute thyroiditis following SARS-CoV-2 vaccination. *Front Med (Lausanne)* 2021;8:737142.
4. Das L, Bhadada SK, Sood A. Post-COVID-vaccine autoimmune/inflammatory syndrome in response to adjuvants (ASIA syndrome) manifesting as subacute thyroiditis. *J Endocrinol Invest* 2022;45:465-7.
5. Franquemont S, Galvez J. Subacute thyroiditis after mRNA vaccine for COVID-19. *J Endocr Soc* 2021;5(Suppl 1):A956.
6. Iremlı BG, Sendur SN, Unluturk U. Three cases of subacute thyroiditis following SARS-CoV-2 vaccine: postvaccination ASIA syndrome. *J Clin Endocrinol Metab* 2021;106:2600-5.
7. Oyibo SO. Subacute thyroiditis after receiving the adenovirus-vectored vaccine for coronavirus disease (COVID-19). *Cureus* 2021;13:e16045.
8. Patel KR, Cunnane ME, Deschler DG. SARS-CoV-2 vaccine-induced subacute thyroiditis. *Am J Otolaryngol* 2022;43:103211.
9. Patel M, Shahid M, Khawaja A, Ejike C, Vemuri K. Subacute thyroiditis secondary to Moderna COVID-19 vaccine: a case report of a rare manifestation. *Adv Clin Med Res Healthc Deliv* 2021;1:9.
10. Ratnayake GM, Dworakowska D, Grossman AB. Can COVID-19 immunisation cause subacute thyroiditis? *Clin Endocrinol (Oxf)* 2021 Jul 17 [Epub]. <https://doi.org/10.1111/cen.14555>.
11. Sahin Tekin M, Saylisoy S, Yorulmaz G. Subacute thyroiditis following COVID-19 vaccination in a 67-year-old male patient: a case report. *Hum Vaccin Immunother* 2021;17:4090-2.
12. Saygili ES, Karakilic E. Subacute thyroiditis after inactive SARS-CoV-2 vaccine. *BMJ Case Rep* 2021;14:e244711.
13. Soltanpoor P, Norouzi G. Subacute thyroiditis following COVID-19 vaccination. *Clin Case Rep* 2021;9:e04812.
14. K yriacou A, Ioakim S, Syed AA. COVID-19 vaccination and a severe pain in the neck. *Eur J Intern Med* 2021;94:95-6.
15. Sigstad E, Groholt KK, Westerheim O. Subacute thyroiditis after vaccination against SARS-CoV-2. *Tidsskr Nor Laegeforen* 2021;141.
16. Schimmel J, Alba EL, Chen A, Russell M, Srinath R. Letter to the Editor: thyroiditis and thyrotoxicosis after the SARS-CoV-2 mRNA vaccine. *Thyroid* 2021;31:1440.
